# Supplementary material for: An NMR study on a pseudo-intramolecular transacylation reaction of an α-aryl-β-keto ester
Source: Royal Society of Chemistry journal article supplement (doi:10.1039/c3ra45568h), 2013-11-14

## Supporting Information

### **An NMR Study on a Pseudo-Intramolecular Transacylation of $\alpha$ -Aryl- $\beta$ -keto Ester**

*Sho Hirai, Haruyasu Asahara, Shotaro Hirao, Jun Sawayama, Ryuichi Sugimoto, Kazuhiko Saigo, and Nagatoshi Nishiwaki\**

School of Environmental Science and Engineering

Kochi University of Technology

Tosayamada, Kami, Kochi 782-8502, Japan

Fax: (+)81 887 57 2520

E-mail: nishiwaki.nagatoshi@kochi-tech.ac.jp

#### **Contents**

|                                                                                                                                            |       |   |
|--------------------------------------------------------------------------------------------------------------------------------------------|-------|---|
| <b>1. General</b>                                                                                                                          | ..... | 1 |
| <b>2. Monitoring the transacylation from 1 to 2 by <math>^1\text{H}</math> NMR by using benzene-<math>d_6</math> as a solvent (0.06 M)</b> | ..... | 2 |
| <b>3. Experimental procedure with results from NMR analysis for starting keto ester 1 and transacylated products 4 and 5</b>               | ..... | 5 |
| <b>4. The reaction of propylamine with acetone in benzene-<math>d_6</math></b>                                                             | ..... | 6 |

#### **1. General**

All the reagents and solvents were purchased from Wako Pure Chemicals and used as received.

The  $^1\text{H}$  spectra were measured on a Bruker Ascend-400 at 400 MHz with TMS as an internal standard.

## 2. Monitoring the transacylation from 1 to 2 by $^1\text{H}$ NMR by using benzene- $d_6$ as a solvent (0.06 M)

After 0 minutes

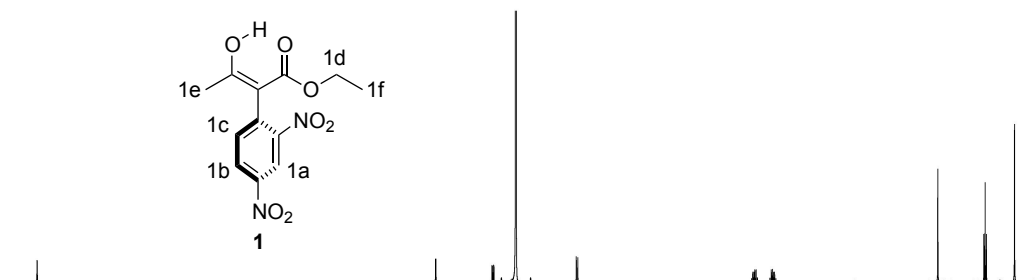

After 3 minutes

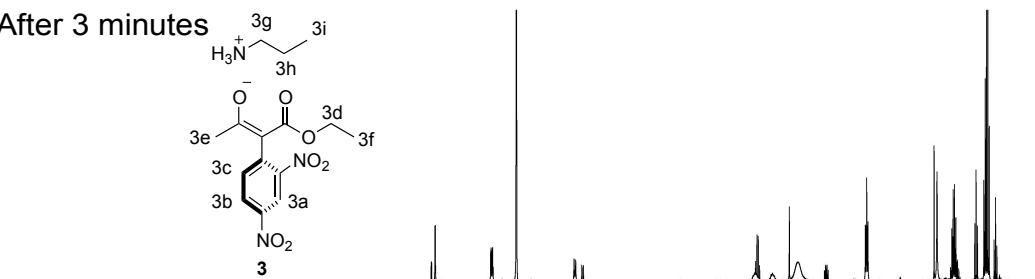

After 30 minutes

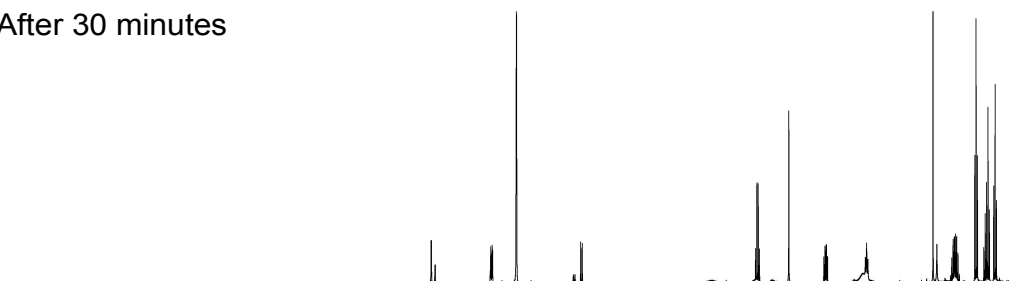

After 1 day

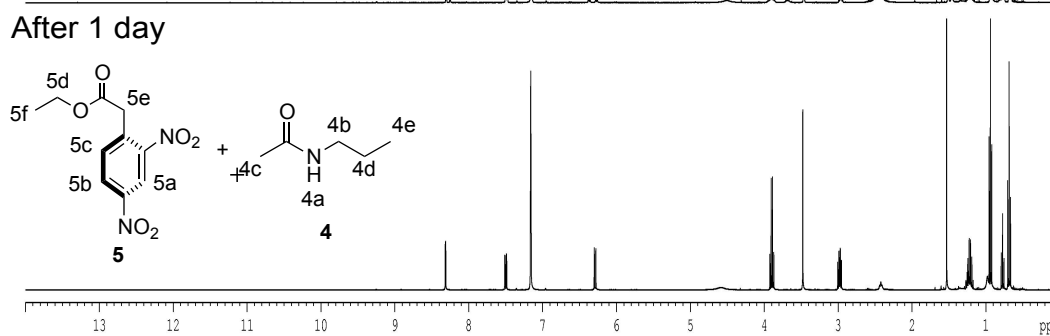

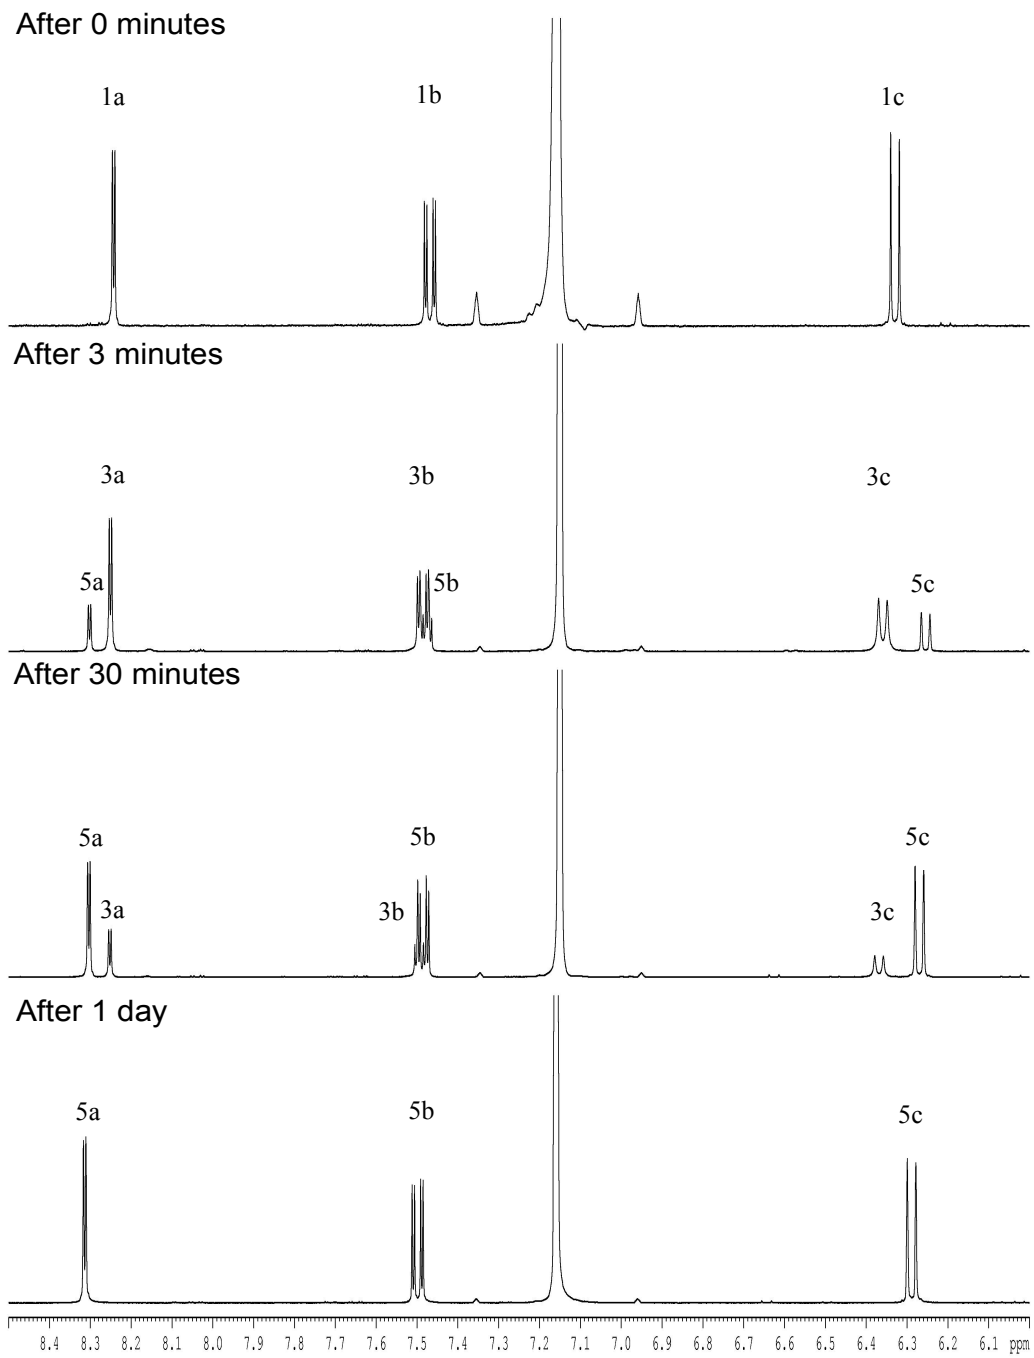

After 0 minutes

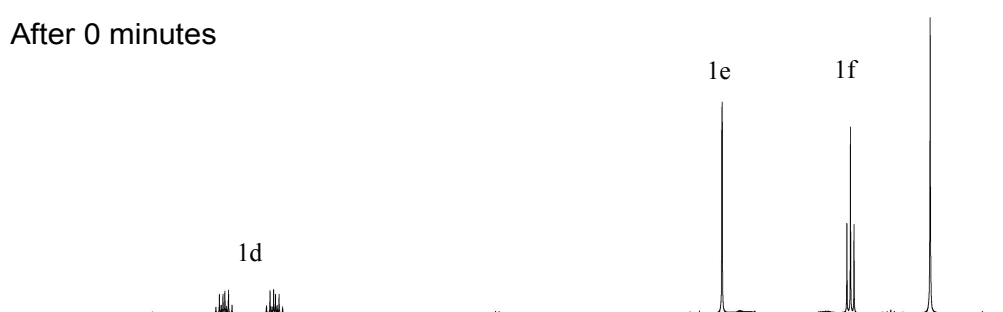

After 3 minutes

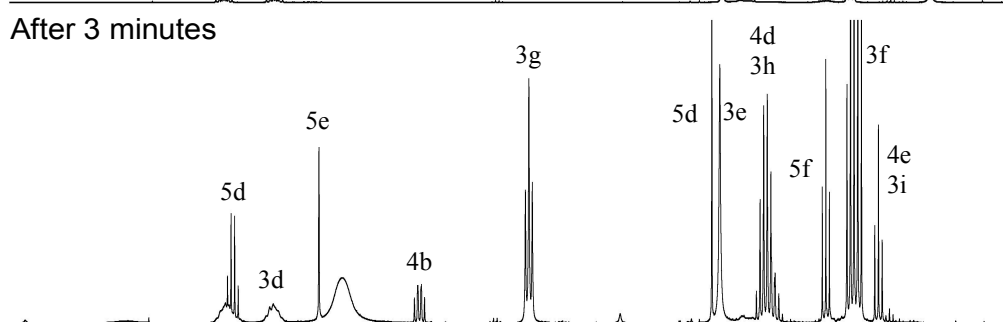

After 30 minutes

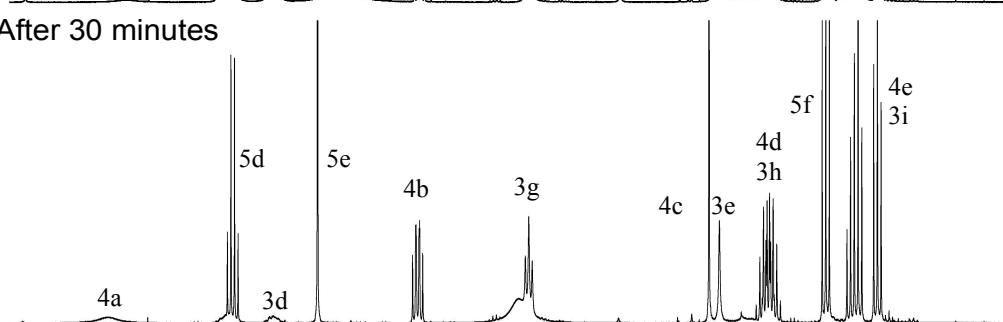

After 1 day

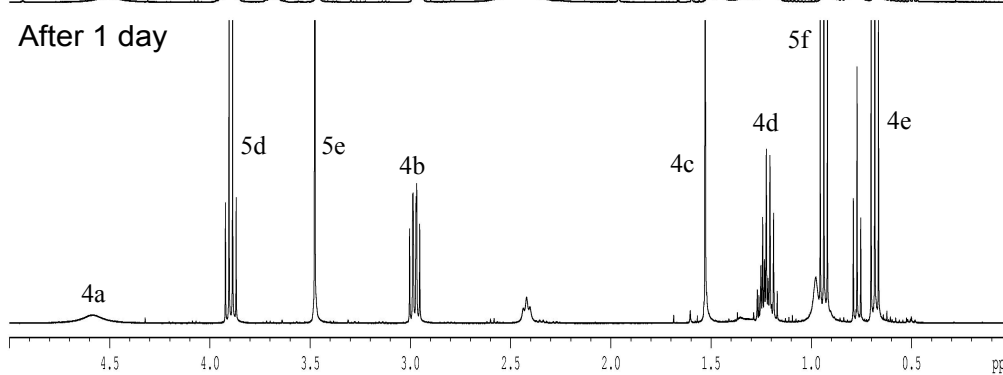



### 3. Experimental procedure with results from NMR analysis for starting keto ester **1** and transacylated products **4** and **5**

#### Ethyl 2-(2,4-dinitrophenyl)-3-hydroxy-2-butenate (**1**)

To a solution of ethyl 3-oxobutanoate (1.30 g, 10 mmol) in THF (10 mL), sodium hydride (60 wt %, 0.80 g, 20 mmol) was gradually added, and the mixture was stirred at room temperature for 15 min. Then 1-chloro-2,4-dinitrobenzene (2.02 g, 10 mmol) was added, and the resultant reddish solution was stirred for 1 day. After addition of 3 M hydrochloric acid (10 mL), generated sodium chloride was filtered off, and the filtrate was concentrated. The extraction of the residue with hot hexane (30 mL  $\times$  3) followed by concentration afforded the keto ester **1** (2.70 g, 9.1 mmol, 91%). Further purification was performed with recrystallization from hexane (mp 93-94 °C, lit.<sup>1</sup> 93.5-95 °C).

<sup>1</sup>H NMR (400 MHz, C<sub>6</sub>D<sub>6</sub>)

$\delta$  0.81 (t, 3H,  $J = 7.2$  Hz), 1.45 (s, 3H), 3.68 (dq, 1H,  $J = 7.2, 18.0$  Hz), 3.93 (dq, 1H,  $J = 7.2, 18.0$  Hz), 6.33 (d, 1H,  $J = 8.4$  Hz), 7.47 (dd, 1H,  $J = 2.4, 8.4$  Hz), 8.24 (d, 1H,  $J = 2.4$  Hz), 13.64 (s, 1H).

#### N-propylacetamide (**4**)

<sup>1</sup>H NMR (400 MHz, C<sub>6</sub>D<sub>6</sub>)

$\delta$  0.68 (t, 3H,  $J = 7.2$  Hz), 1.22 (tq, 2H,  $J = 7.2, 7.2$  Hz), 1.53 (s, 3H), 2.98 (dt, 2H,  $J = 6.0, 7.2$  Hz), 4.5-4.7 (br, 1H).

#### Ethyl (2,4-dinitrophenyl)acetate (**5**)

<sup>1</sup>H NMR (400 MHz, C<sub>6</sub>D<sub>6</sub>)

$\delta$  0.94 (t, 3H,  $J = 7.2$  Hz), 3.48 (s, 2H), 3.90 (q, 2H,  $J = 7.2$  Hz), 6.29 (d, 1H,  $J = 8.4$  Hz), 7.50 (dd, 1H,  $J = 2.4, 8.4$  Hz), 8.31 (d, 1H,  $J = 2.4$  Hz).

### Reference

- 1 H. J. Shine, B.-J. Zhao, J. N. Marx, T. Ould-Ely, K. H. Whitmire, *J. Org. Chem.* **2004**, *69*, 9255–9261.

#### 4. The reaction of propylamine with acetone in benzene- $d_6$

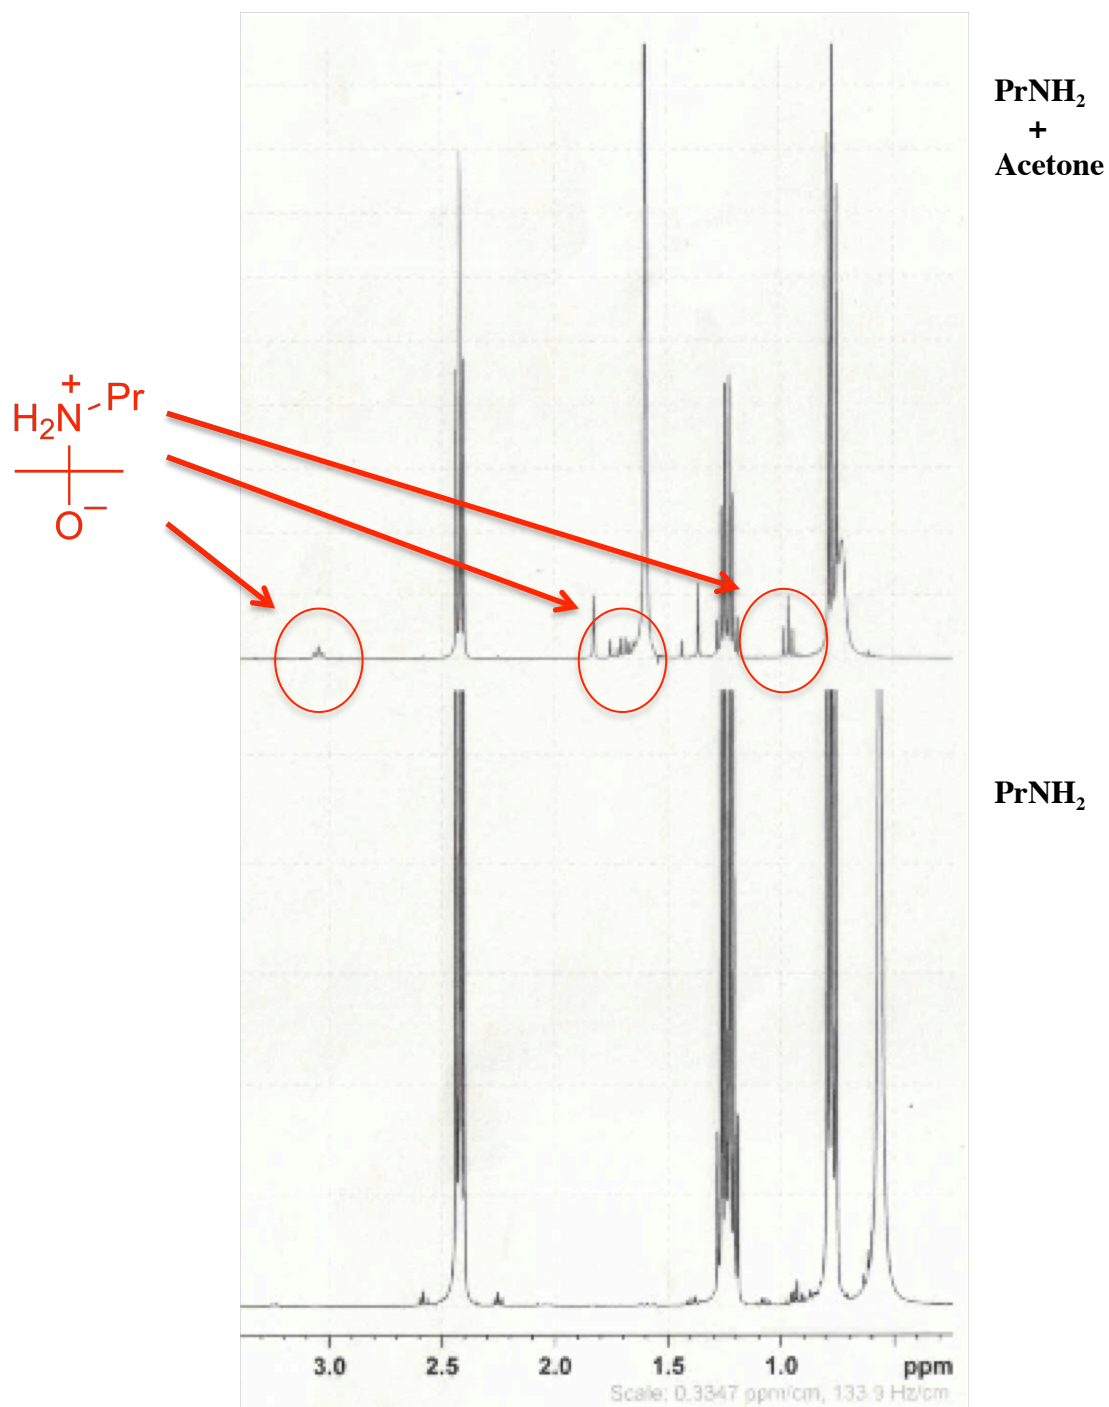

Supplement: c3ra45568h.pdf [file c3ra45568h.pdf]
